# Supplementary material for: Separated-structured all-organic dielectric elastomer with large actuation strain under ultra-low voltage and high mechanical strength
Source: Royal Society of Chemistry journal article supplement (doi:10.1039/c4ta04197f), 2014-10-17
Supplement: c4ta04197f1.pdf [file c4ta04197f1.pdf]

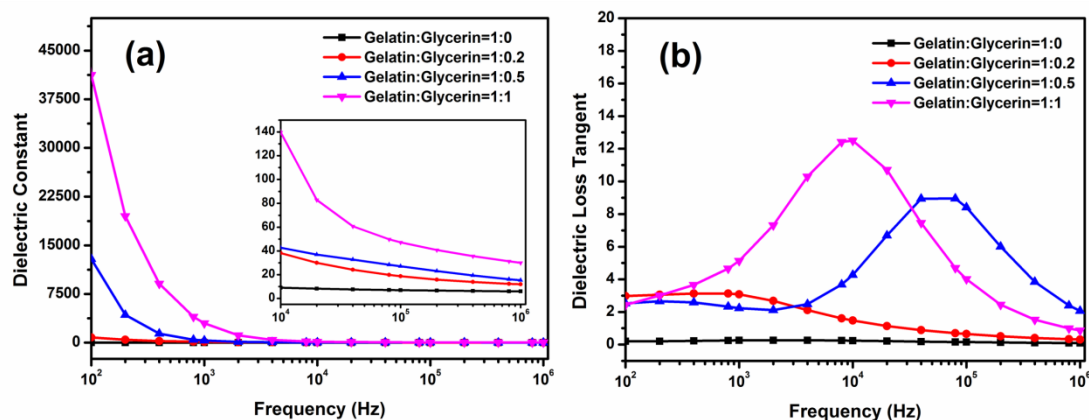

Figure S-1. (a) Dielectric constant and (b) dielectric loss of GG fillers with different ratios of gelatin to glycerin in the frequency range of  $10^2$  to  $10^6$  Hz at room temperature.

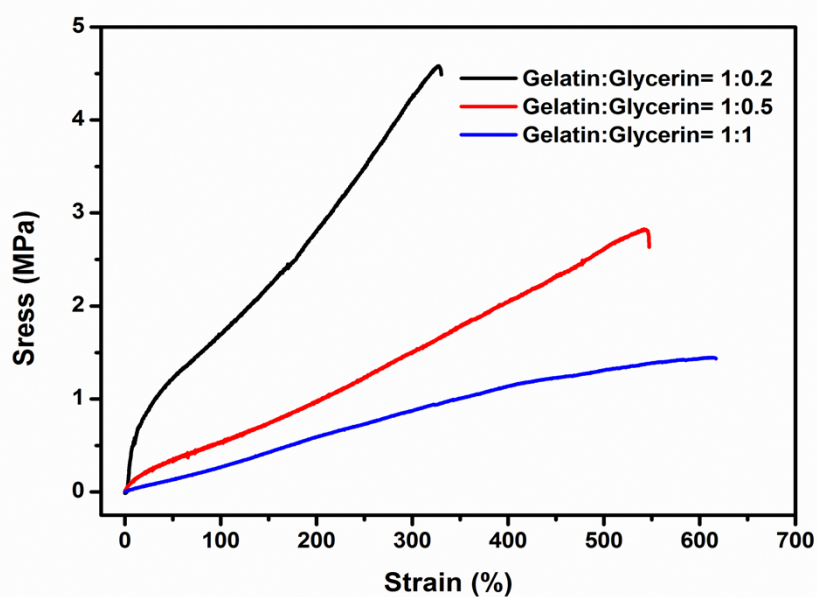

Figure S-2. Stress-strain curves of GG fillers with different ratios of gelatin to glycerin.

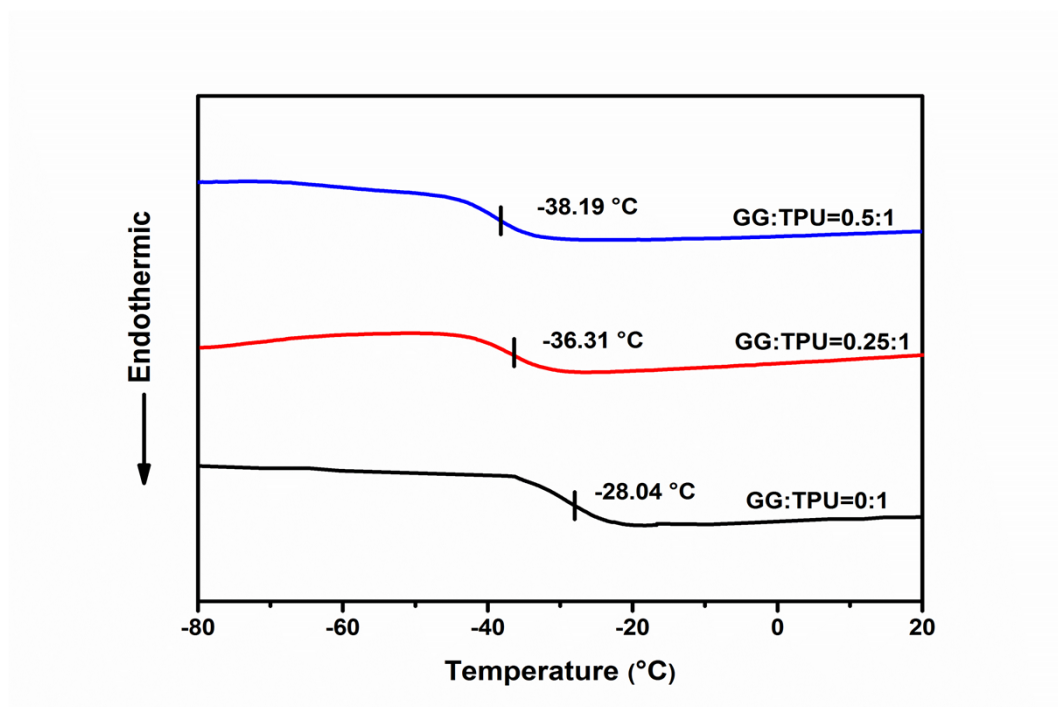

Figure S-3. DSC thermograms of pure TPU and GG/TPU composites as a function of temperature.

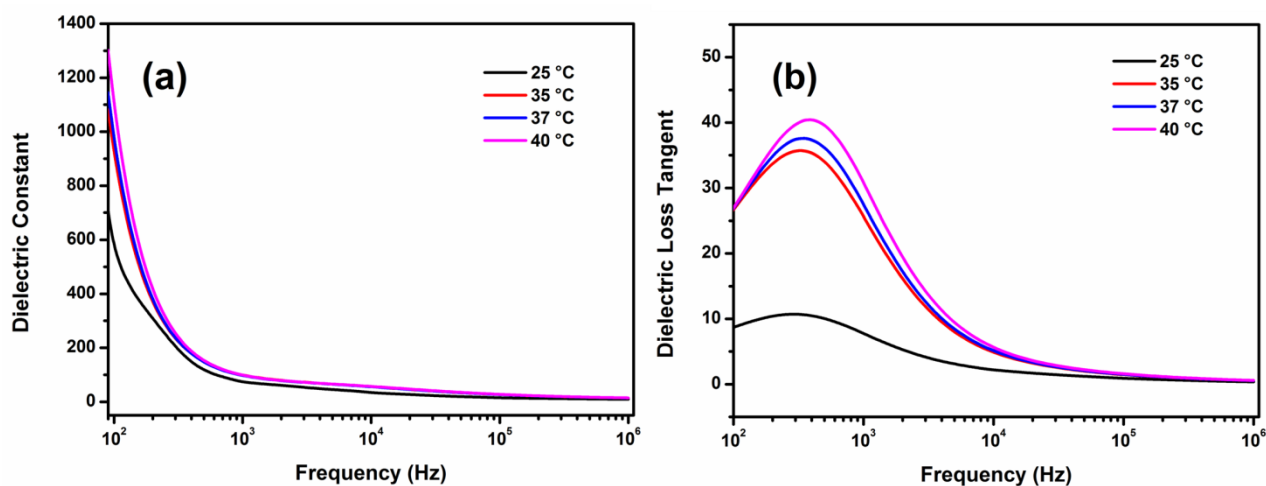

Figure S-4. (a) Dielectric constant and (b) dielectric loss of GG/TPU composite at the mass ratio of 0.5:1 in the frequency range of  $10^2$  to  $10^6$  Hz at different temperatures.
